# Supplementary material for: Exploring the efficacy of Cystoseira sedoide alga for cadmium and copper biosorption: an integrated experimental and computational study
Source: Royal Society of Chemistry journal article supplement (doi:10.1039/d4ra07331b), 2024-01-01
Supplement: d4ra07331b1.pdf [file d4ra07331b1.pdf]

## Exploring the Efficacy of *Cystoseira sedoide* alga for Cadmium and Copper Biosorption: An Integrated Experimental and Computational Study

Nadjette BENGOURNA<sup>a</sup>, Karima BELGUIDOUM<sup>b</sup>, Dounya KHALLA<sup>c</sup>, Mouna NACEF<sup>c</sup>,  
Imane KOUADRI<sup>c</sup>, Aida BENHAMIDA<sup>a</sup>, Habiba AMIRA-GUEBAILIA<sup>b</sup>, Alaa eddine  
BROUK<sup>c</sup>, Abed Mohamed AFFOUNE<sup>c</sup>, Hamid SATHA<sup>a</sup>

<sup>a</sup>Laboratoire des Silicates, Polymères et des Nanocomposites (LSPN), Université 8 Mai 1945,  
Guelma, BP 401, Guelma, 24000, Algeria.

<sup>b</sup>Laboratoire de Chimie Appliquée (L.C.A), Université 8 Mai 1945, BP 401, 24000 Guelma, Algeria

<sup>c</sup>Laboratoire d'Analyses Industrielles et Génie des Matériaux (L.A.I.G.M), Université 8 Mai 1945  
Guelma, BP 401 Guelma 24000, Algeria.

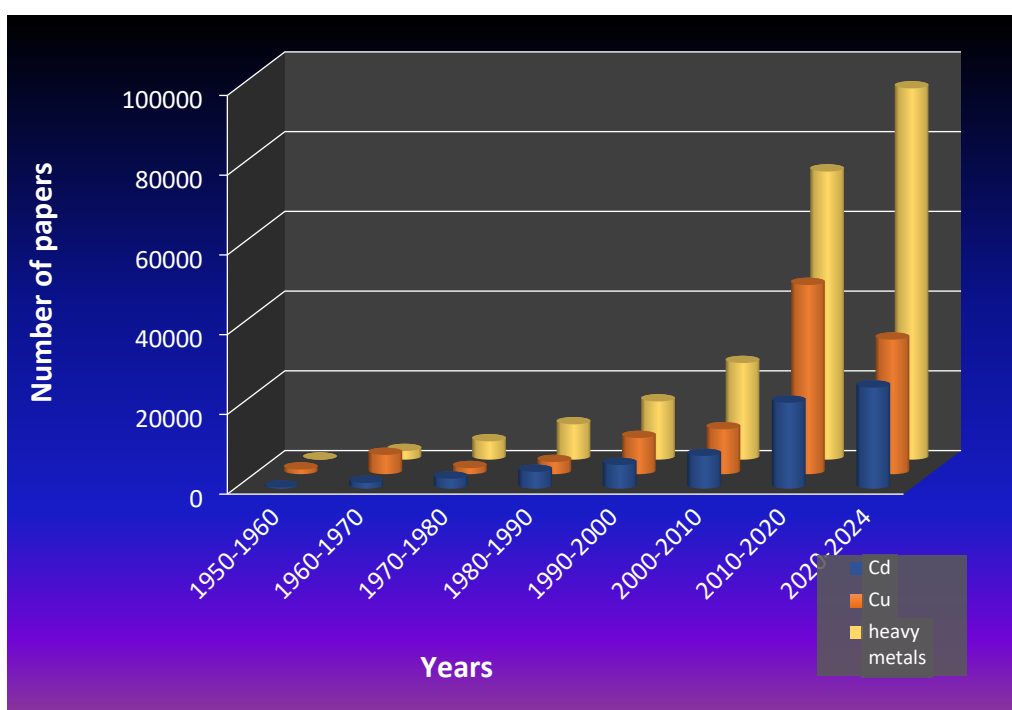

**Figure S1.** Published documents per year related to heavy metals adsorption (from Science Direct database). Keywords: Heavy metals, Cadmium, Copper, Adsorption.

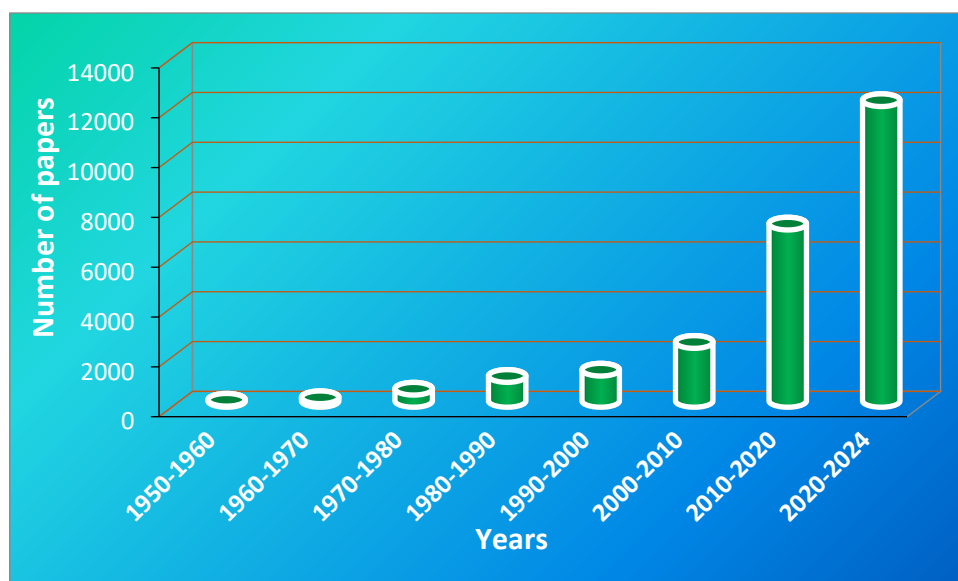

**Figure S2.**Published documents per year related to the use of algae in the adsorption (from Science Direct database). Keywords: Algae, Adsorption.

**Table S1.**Functional groups of *Cystoseira sedoide* alga before and after Cd<sup>2+</sup> and Cu<sup>2+</sup>biosorption.

| <i>C. sedoide</i> | Wavelength (cm <sup>-1</sup> ) |                       | Functional groups                                      |
|-------------------|--------------------------------|-----------------------|--------------------------------------------------------|
|                   | Cu / <i>C. sedoide</i>         | Cd/ <i>C. sedoide</i> |                                                        |
| 868.34            | 866.48                         | 864.62                | C-H out of plane bending vibrations in aromatic groups |
| 1011.77           | 1009.90                        | 1011.77               | C-O bonds of saccharide structure                      |
| 1410.37           | 1410.37                        | 1408.51               | -COO- symmetric stretching vibrations                  |
| 1596.63           | 1585.46                        | 1596.63               | -COO- asymmetric stretching vibrations                 |
| 2919.10           | -----                          | -----                 | -CH stretching vibrations (νCH, alkyl).                |
| 3265              | 3265                           | 3265                  | -OH stretching vibration                               |

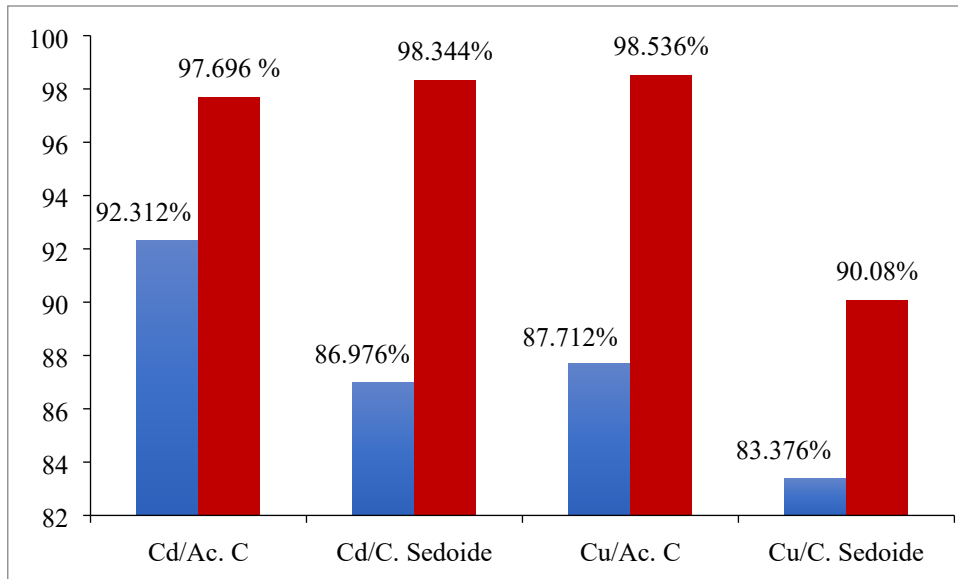

**Figure S3.** Effect of the solution stirring on the adsorption of  $\text{Cd}^{2+}$  and  $\text{Cu}^{+2}$  on *C. sedoide* and Ac.C.  
Blue: without stirring and red: with stirring at 300 rpm.

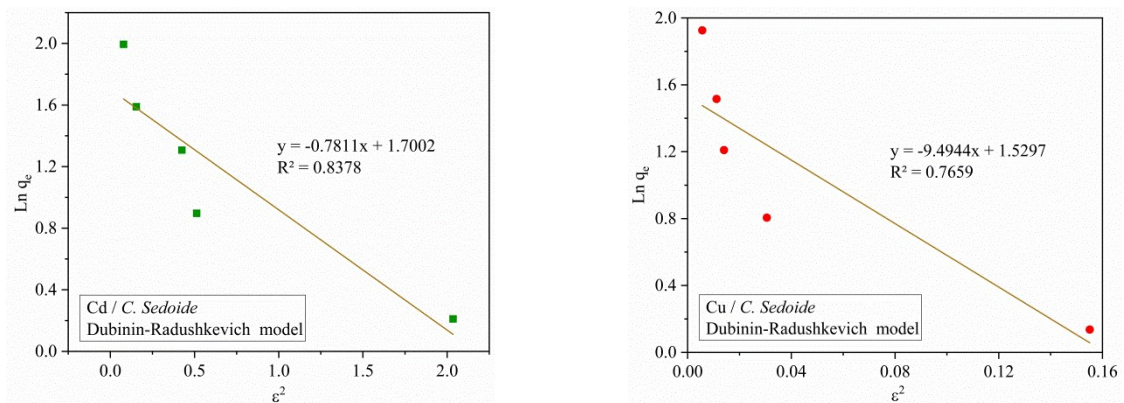

**Figure S4.** Linearized plots of Dubinin-Radushkevich (D-R) model for different isotherm models for  $\text{Cd}^{2+}$  ions biosorption on *C. sedoide*

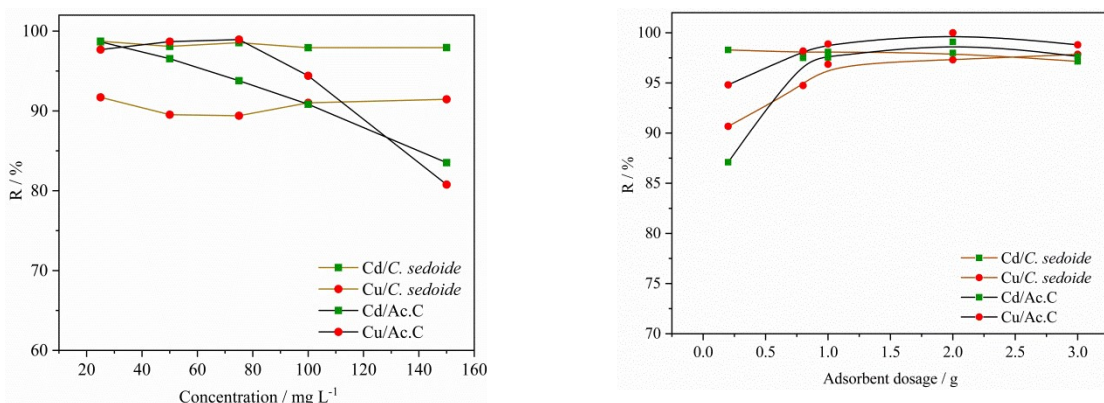

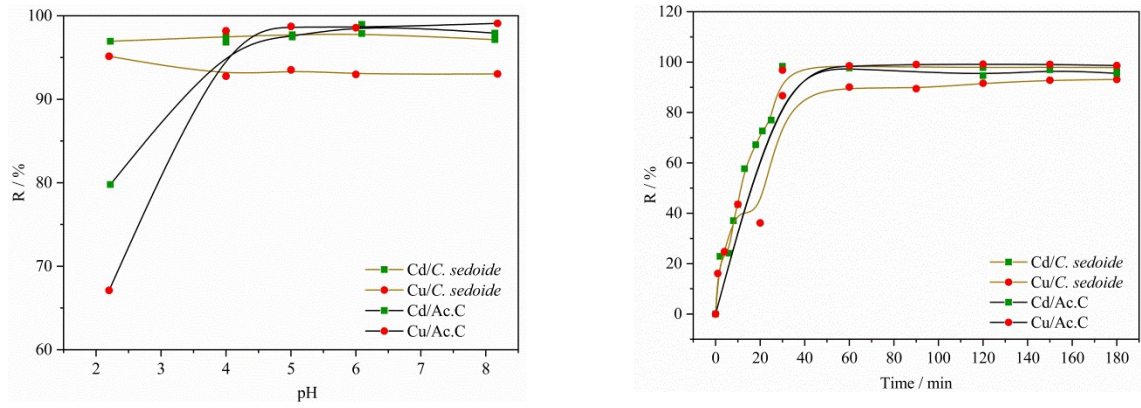

**Figure S5.** Effect of initial concentration, *C. sedoide* alga and Ac.C doses, pH, and temperature on the removal rate of  $\text{Cd}^{2+}$  and  $\text{Cu}^{2+}$  ions

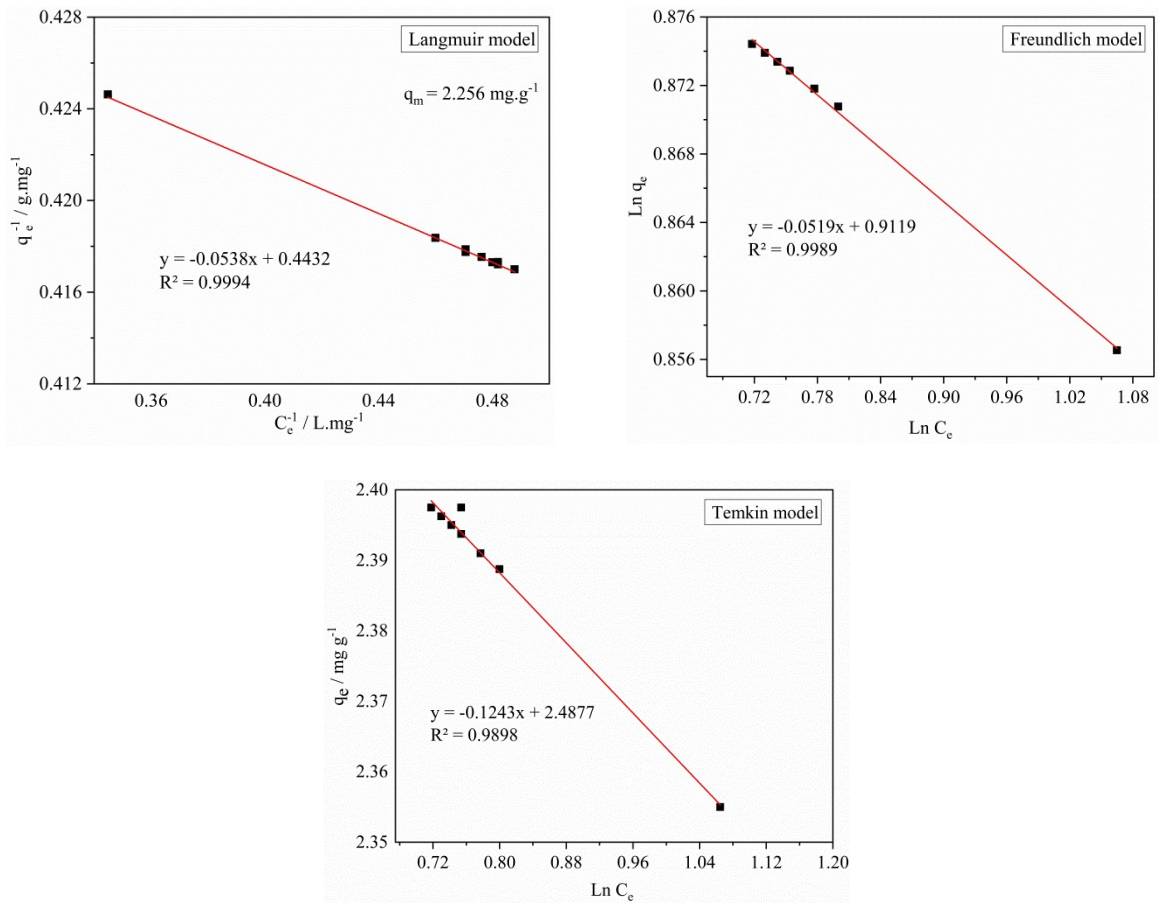

**Figure S6.** Linearized plots of different isotherm models for  $\text{Cd}^{2+}$  ions biosorption on *C. sedoide* in the presence of  $\text{Cu}^{2+}$  ions.

**Table S2.** Summary of Dubinin-Radushkevich (D-R) model used for the adsorption of Cd<sup>2+</sup> and Cu<sup>2+</sup>.

|                                          |                                                                                                                                                                                                                       |
|------------------------------------------|-----------------------------------------------------------------------------------------------------------------------------------------------------------------------------------------------------------------------|
| Dubinin-Radushkevich equation            | $q_e = q_{DR} \exp\left(-B_{DR} \varepsilon_{DR}^2\right)$                                                                                                                                                            |
| Dubinin-Radushkevich linearized equation | $\ln q_e = \ln q_{DR} \beta \varepsilon^2$                                                                                                                                                                            |
| Polanyi potential                        | $\varepsilon_{DR} = RT \ln \left(\frac{C_s}{C_e}\right)$                                                                                                                                                              |
| The mean free energy of biosorption(E)   | $E = \frac{1}{\sqrt{2} \beta_{DR}}$                                                                                                                                                                                   |
| E significance                           | 8 kJ/mol < E < 16 kJ/mol → Chemisorption<br>E < 8 kJ/mol → Physisorption                                                                                                                                              |
| Results                                  | Cd <sup>2+</sup> / <i>C. Sedoide</i> : E= 14.2 kJ/mol<br>Cu <sup>2+</sup> / <i>C. Sedoide</i> : E= 8.45 kJ/mol<br>Cd <sup>2+</sup> / <i>Ac.C</i> : E= 11.2 kJ/mol<br>Cu <sup>2+</sup> / <i>Ac.C</i> : E= 15.58 kJ/mol |

**Table S3.** Thermodynamic parameters of Cd<sup>2+</sup> and Cu<sup>2+</sup> biosorption on *C. Sedoide*

| Thermodynamic parameters                              | Cadmium | Copper  |
|-------------------------------------------------------|---------|---------|
| $\Delta H^0$ (kJ.mol <sup>-1</sup> )                  | 3.0899  | 9.36    |
| $\Delta S^0$ (kJ.mol <sup>-1</sup> .K <sup>-1</sup> ) | 0.042   | 0.050   |
|                                                       | 293 K   | - 9.234 |
|                                                       | 303 K   | - 9.674 |
| $\Delta G^0$ (kJ.mol <sup>-1</sup> )                  | 313 K   | -10.106 |
|                                                       | 323 K   | -10.540 |
|                                                       | 333 K   | -10.902 |

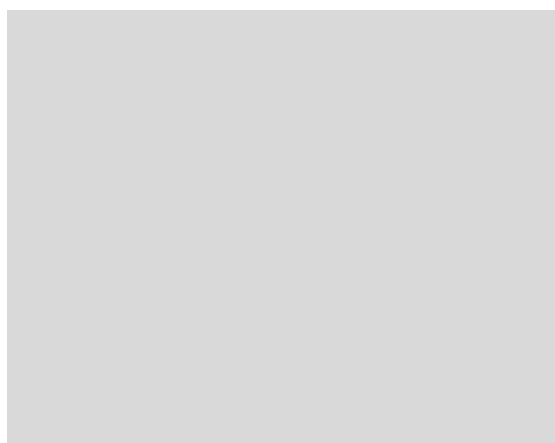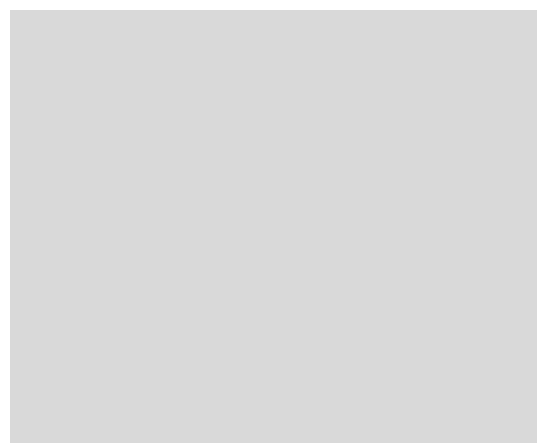

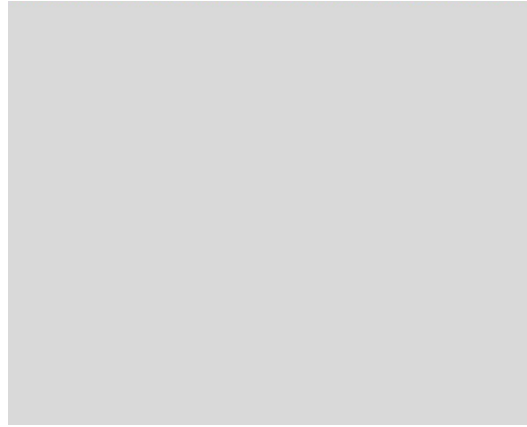

**Figure S7.** Linearized plots of different isotherm models for Cd<sup>2+</sup> ions biosorption on *C. sedoide* in the presence of Cu<sup>2+</sup> ions

**Table S4.** Competitive biosorption parameters of Cd<sup>2+</sup> on *C. sedoide* in the binary-metal system

|                  |                                     | Biosorption capacity ratio                    | Biosorption reduction rate                                             |
|------------------|-------------------------------------|-----------------------------------------------|------------------------------------------------------------------------|
| Metal            | Adsorption systems                  | $q_{ratio} = \frac{q_{m,i}^{mix}}{q_{m,i}^0}$ | $\Delta Y = \frac{q_{m,i}^0 - q_{m,i}^{mix}}{q_{m,i}^0} \times 100 \%$ |
| Cd <sup>2+</sup> | Cd <sup>2+</sup> , Cu <sup>2+</sup> | 0.208                                         | 79.25                                                                  |

**Table S5.** The Mulliken charge of Cd<sup>2+</sup> and Cu<sup>2+</sup> before and after complexation with alginate in different configurations.

| Metal                           | Charge              |                          |
|---------------------------------|---------------------|--------------------------|
|                                 | Before complexation | After complexation       |
| Cu(ALG) <sup>+2</sup> /Symetrie | 2                   | 0.969                    |
| Cu(ALG) <sup>+2</sup> /Inverse  | 2                   | 1.096                    |
| Cd(ALG) <sup>+2</sup> /Symetrie | 2                   | 1.682                    |
| Cd(ALG) <sup>+2</sup> /Inverse  | 2                   | 1.676                    |
| (Cu-ALG-Cu) <sup>+4</sup>       | 4                   | Cu <sub>45</sub> : 0.809 |
|                                 |                     | Cu <sub>44</sub> : 0.815 |
| (Cd-ALG-Cd) <sup>+4</sup>       | 4                   | Cd <sub>45</sub> : 1.871 |
|                                 |                     | Cd <sub>44</sub> : 1.849 |
| (Cu-ALG-Cd) <sup>+4</sup>       | 4                   | Cd <sub>44</sub> : 1.868 |
|                                 |                     | Cu <sub>45</sub> : 0.802 |
